# Supplementary material for: The 2014 Ebola virus outbreak in West Africa highlights no evidence of rapid evolution or adaptation to humans
Source: PubMed Central journal article supplement (PMC5073338; doi:10.1038/srep35822), 2016-10-21
Supplement: srep35822-s1.pdf [file srep35822-s1.pdf]

## **The current 2014 Ebola virus outbreak in West Africa highlights no evidence of rapid evolution or adaptation to humans**

Xingguang LI<sup>1, #</sup>, Junjie ZAI<sup>2, #</sup>, Haizhou LIU<sup>3, #</sup>, Yi FENG<sup>1</sup>, Fan LI<sup>1</sup>, Jing WEI<sup>1</sup>, Sen ZOU<sup>1</sup>, Zhiming YUAN<sup>2, \*</sup> and Yiming SHAO<sup>1, \*</sup>

<sup>#</sup>These authors contributed equally to this work. <sup>\*</sup>These authors contributed equally to this work.

1. State Key Laboratory for Infectious Disease Prevention and Control, National Center for AIDS/STD Control and Prevention, Chinese Center for Disease Control and Prevention, Beijing, China. Collaborative Innovation Center for Diagnosis and Treatment of Infectious Diseases, Hangzhou, Zhejiang, China.
2. Key Laboratory of Agricultural and Environmental Microbiology, Wuhan Institute of Virology, University of Chinese Academy of Sciences, Wuhan, Hubei, China.
3. Centre for Emerging Infectious Diseases, The State Key Laboratory of Virology, Wuhan Institute of Virology, University of Chinese Academy of Sciences, Wuhan, Hubei, China.

Corresponding authors:

Yiming SHAO, Division of Research on Virology and Immunology, National Center for AIDS/STD Control and Prevention, Chinese Center for Disease Control and Prevention, No. 155 Changbai Road, Changping District, Beijing 102206, China. Tel: +86 10 58900981; Fax: +86 10 58900980; E-mail: yshao08@gmail.com.

Zhiming YUAN, Key Laboratory of Agricultural and Environmental Microbiology, Wuhan Institute of Virology, University of Chinese Academy of Sciences, No. 44, Xiaohongshan, Wuhan, Hubei, 430071, China. Tel: +86 27 87197242; Fax: +86 27 87198120; E-mail: yzm@wh.iov.cn.

Condensed Title: Demographics of the current 2014 EBOV

A

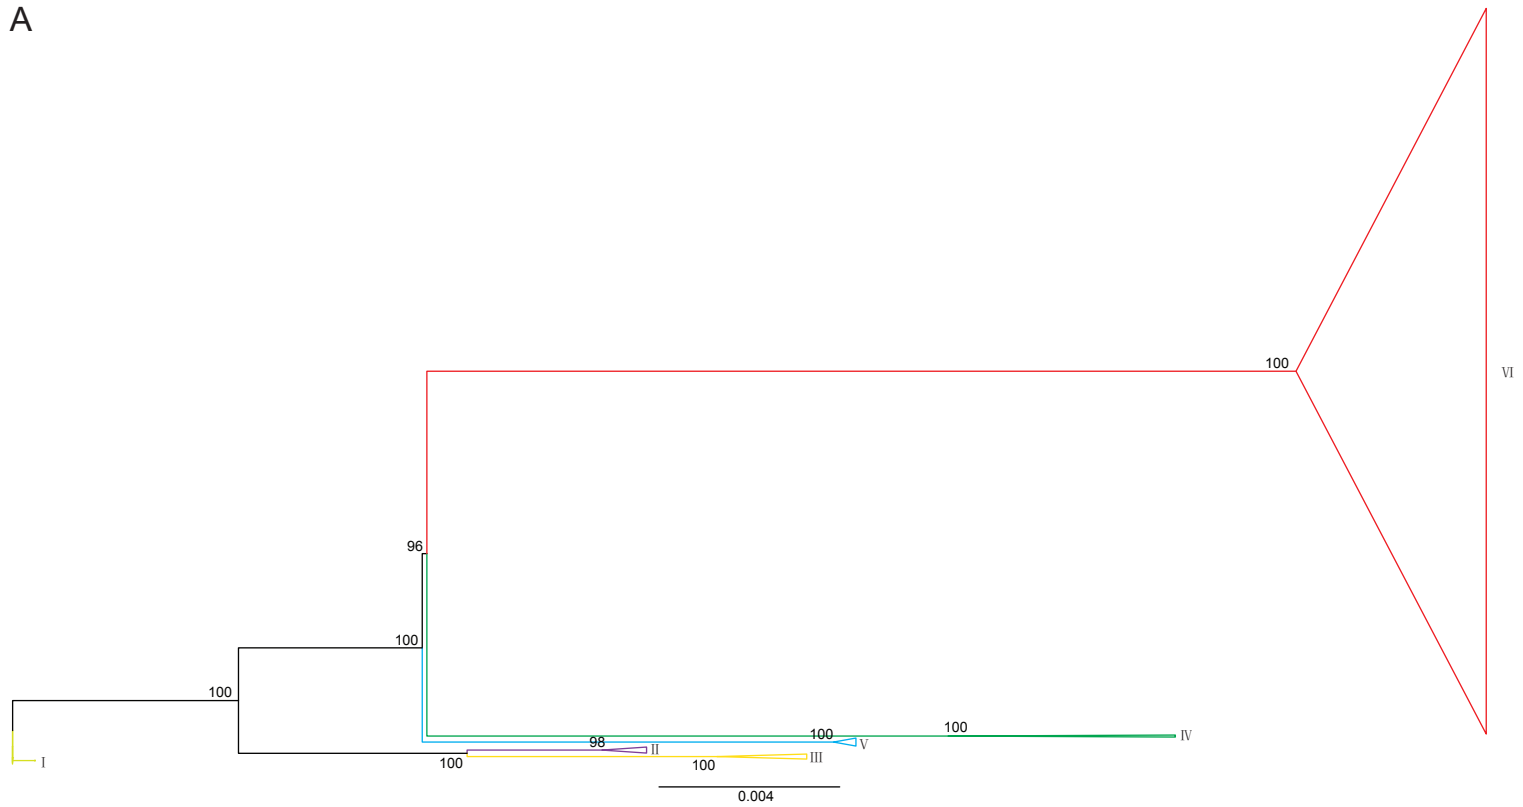

B

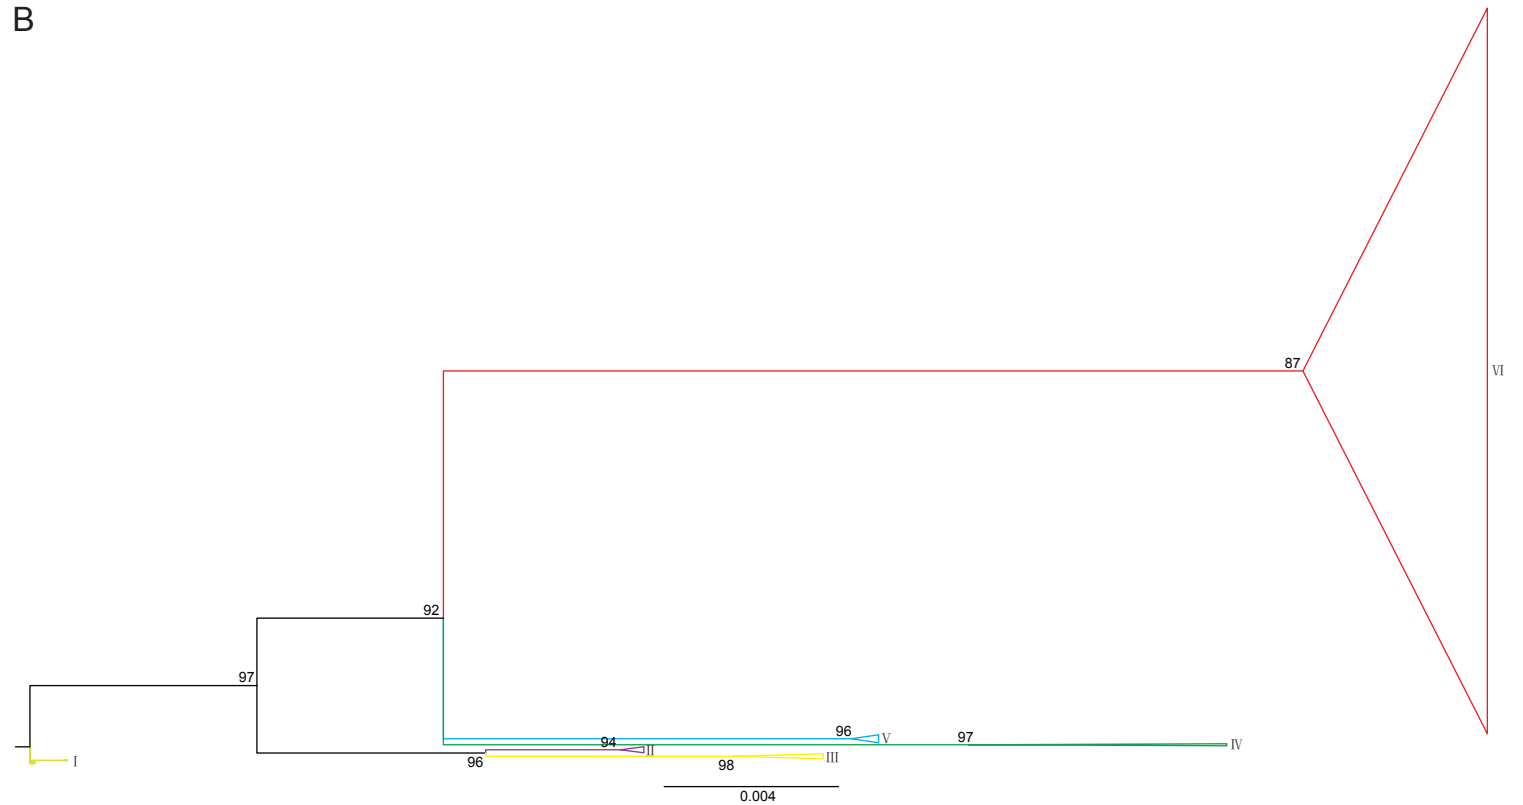

**Supplementary Fig. S1. Phylogenetic relationship of EBOV between distinct outbreaks in West Africa.** (A) Maximum likelihood (ML) phylogenetic tree of GP gene sequences of EBOV was constructed using RAxML. (B) Maximum likelihood (ML) phylogenetic tree of GP Gene sequences of EBOV was constructed using GARLI. All horizontal branch lengths are scaled to the number of nucleotide substitutions per site. Bootstrap values are shown for key nodes.

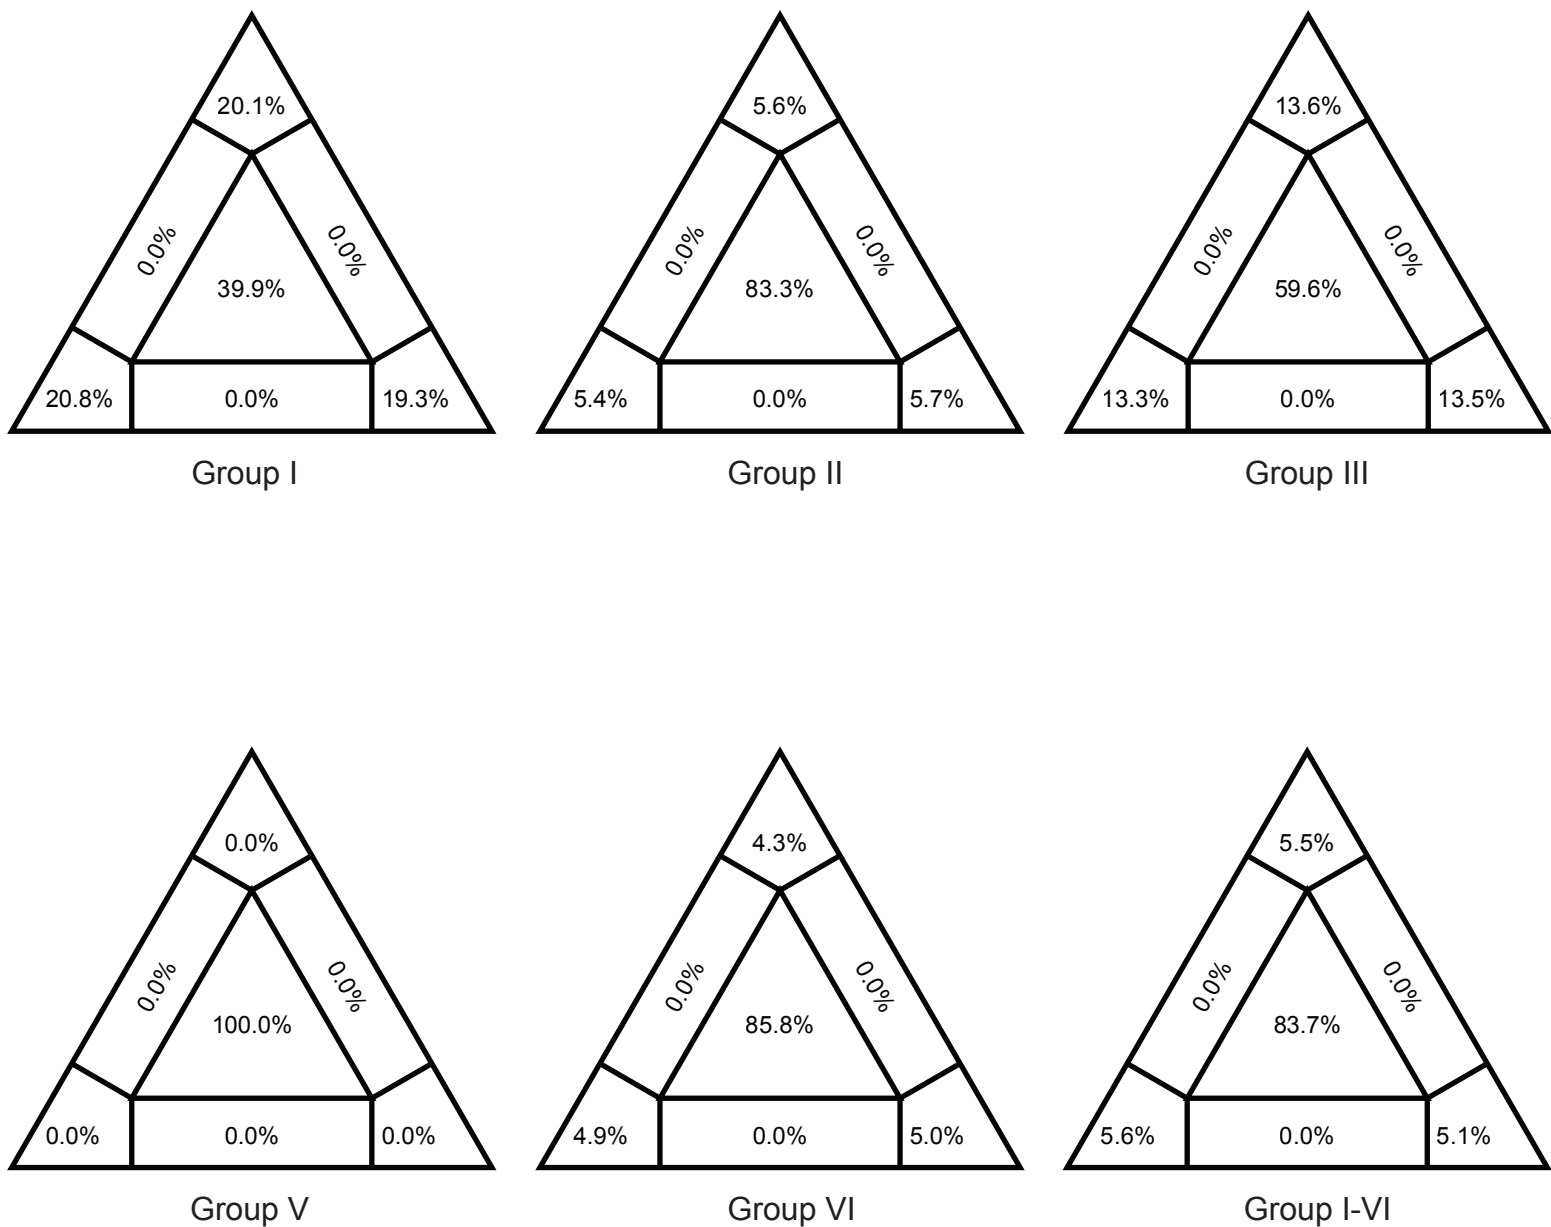

**Supplementary Fig. S2. Likelihood-mapping analyses of EBOV epidemic waves.**

According to the lineages defined by the ML phylogenetic analyses of GP gene sequences of EBOV (Fig. S1), likelihood-mapping analyses were performed for each and overall lineages of EBOV epidemics with lineage IV excluded.

A

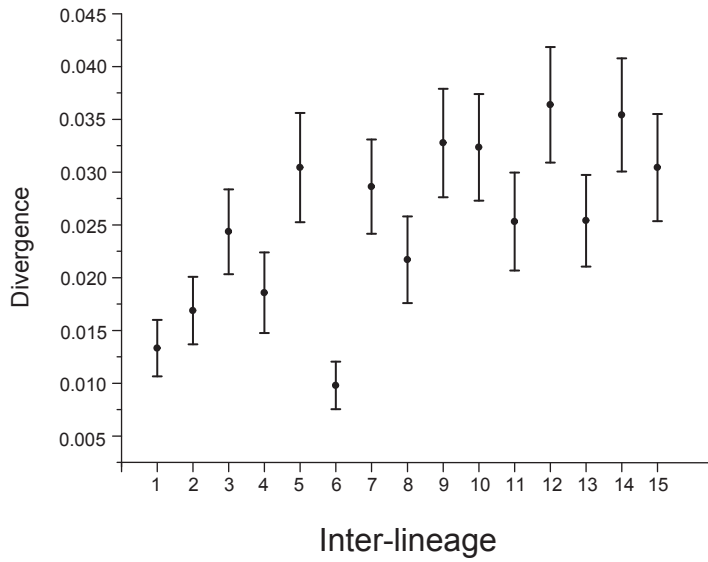

B

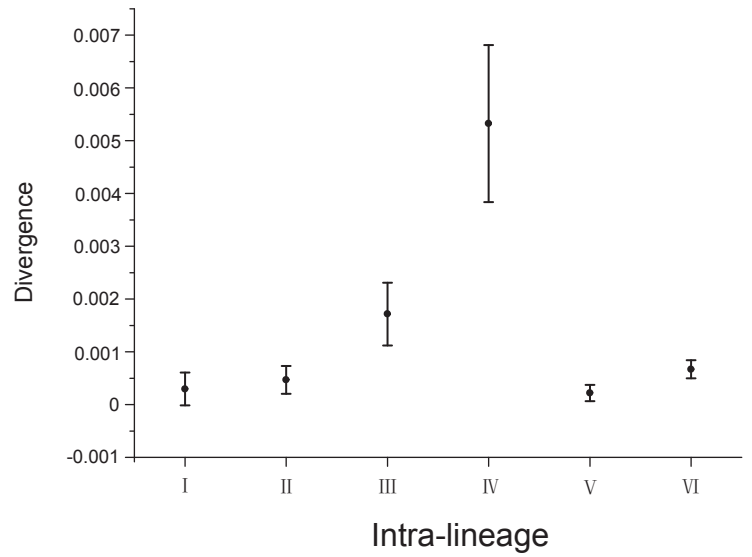

**Supplementary Fig. S3. Comparison of inter-lineage and intra-lineage evolutionary divergence of GP gene sequences of EBOV.** Inter-lineage (A) and intra-lineage (B) evolutionary divergence and standard error estimates of GP gene sequences of EBOV were calculated using maximum composite likelihood model with a gamma distribution.

**Supplementary Table 1. List of Ebola virus glycoprotein (GP) sequences by country and collection used in the present study.**

| <b>Accession number</b> | <b>Strain/Isolate name</b> | <b>Collection Country</b>    | <b>Collection date</b> |
|-------------------------|----------------------------|------------------------------|------------------------|
| KR063671                | YambukuMayinga             | Democratic Republic of Congo | 1976-10-1              |
| KR063672                | Kikwit807223               | Democratic Republic of Congo | 1995-4-1               |
| AY354458                | Zaire                      | Democratic Republic of Congo | 1995                   |
| HQ613402                | 034-KS                     | Democratic Republic of Congo | 2008-12-31             |
| HQ613403                | M-M                        | Democratic Republic of Congo | 2007-8-31              |
| JQ352763                | Kikwit                     | Democratic Republic of Congo | 1995-5-4               |
| KC242784                | Luebo9                     | Democratic Republic of Congo | 2007                   |
| KC242785                | Lueb0                      | Democratic Republic of Congo | 2007                   |
| KC242786                | Luebo1                     | Democratic Republic of Congo | 2007                   |
| KC242787                | Luebo23                    | Democratic Republic of Congo | 2007                   |
| KC242788                | Luebo43                    | Democratic Republic of Congo | 2007                   |
| KC242789                | Luebo43                    | Democratic Republic of Congo | 2007                   |
| KC242790                | Luebo5                     | Democratic Republic of Congo | 2007                   |
| KC242791                | Bonduni                    | Democratic Republic of Congo | 1977                   |
| KC242792                | Gabon                      | Gabon                        | 1994                   |
| KC242793                | 1Eko                       | Gabon                        | 1996                   |
| KC242794                | 2Nza                       | Gabon                        | 1996                   |
| KC242795                | 1Mbie                      | Gabon                        | 1996                   |
| KC242796                | 13625Kikwit                | Democratic Republic of Congo | 1995                   |
| KC242797                | 1Oba                       | Gabon                        | 1996                   |
| KC242798                | 1Ikot                      | Gabon                        | 1996                   |
| KC242799                | 13709Kikwit                | Democratic Republic of Congo | 1995                   |
| KC242800                | Ilembe                     | Gabon                        | 2002                   |
| KC242801                | deRoover                   | Democratic Republic of Congo | 1976                   |
| KF113528                | Kelle1                     | Democratic Republic of Congo | 2003                   |
| KF113529                | Kelle2                     | Democratic Republic of Congo | 2003                   |
| KM655246                | YambukuEcran               | Democratic Republic of Congo | 1976                   |
| KR824526                | Zaire199510621             | Democratic Republic of Congo | 1995                   |
| KR867676                | Kikwit9510621              | Democratic Republic of Congo | 1995-5-4               |
| NC002549                | YambukuMayinga             | Democratic Republic of Congo | 1976                   |
| KJ660346                | C15                        | Guinea                       | 2014-3-17              |
| KJ660347                | C07                        | Guinea                       | 2014-3-20              |
| KJ660348                | C05                        | Guinea                       | 2014-3-19              |
| KP260799                | DPR1                       | Mali                         | 2014-10-23             |
| KP260800                | DPR2                       | Mali                         | 2014-11-12             |
| KP260801                | DPR3                       | Mali                         | 2014-11-21             |
| KP260802                | DPR4                       | Mali                         | 2014-11-12             |
| KP184503                | UK1.1                      | Sierra Leone                 | 2014-8-25              |
| KP658432                | UK2                        | Sierra Leone                 | 2014-12-29             |
| KP701371                | INMI1                      | Sierra Leone                 | 2014-11-25             |
| KP728283                | GE1                        | Sierra Leone                 | 2014-11-21             |
| KR025228                | UK3                        | Sierra Leone                 | 2015-3-12              |
| KM034550                | EM095                      | Sierra Leone                 | 2014-5-25              |
| KM034551                | EM096                      | Sierra Leone                 | 2014-5-26              |

|          |         |              |           |
|----------|---------|--------------|-----------|
| KM034552 | EM098   | Sierra Leone | 2014-5-26 |
| KM034553 | G3670.1 | Sierra Leone | 2014-5-27 |
| KM034554 | G3676.1 | Sierra Leone | 2014-5-27 |
| KM034556 | G3677.1 | Sierra Leone | 2014-5-26 |
| KM034558 | G3679.1 | Sierra Leone | 2014-5-28 |
| KM034559 | G3680.1 | Sierra Leone | 2014-5-28 |
| KM034560 | G3682.1 | Sierra Leone | 2014-5-28 |
| KM034561 | G3683.1 | Sierra Leone | 2014-5-28 |
| KM034562 | G3686.1 | Sierra Leone | 2014-5-28 |
| KM034563 | G3687.1 | Sierra Leone | 2014-5-28 |
| KM233035 | EM104   | Sierra Leone | 2014-6-2  |
| KM233036 | EM106   | Sierra Leone | 2014-6-2  |
| KM233037 | EM110   | Sierra Leone | 2014-6-3  |
| KM233038 | EM111   | Sierra Leone | 2014-6-3  |
| KM233039 | EM112   | Sierra Leone | 2014-6-3  |
| KM233040 | EM113   | Sierra Leone | 2014-6-3  |
| KM233041 | EM115   | Sierra Leone | 2014-6-3  |
| KM233042 | EM119   | Sierra Leone | 2014-6-3  |
| KM233043 | EM120   | Sierra Leone | 2014-6-3  |
| KM233044 | EM121   | Sierra Leone | 2014-6-4  |
| KM233045 | EM124.1 | Sierra Leone | 2014-6-4  |
| KM233049 | G3707   | Sierra Leone | 2014-5-31 |
| KM233050 | G3713.2 | Sierra Leone | 2014-6-9  |
| KM233053 | G3724   | Sierra Leone | 2014-6-5  |
| KM233054 | G3729   | Sierra Leone | 2014-6-7  |
| KM233055 | G3734.1 | Sierra Leone | 2014-6-7  |
| KM233056 | G3735.1 | Sierra Leone | 2014-6-7  |
| KM233058 | G3750.1 | Sierra Leone | 2014-6-10 |
| KM233061 | G3752   | Sierra Leone | 2014-6-10 |
| KM233062 | G3758   | Sierra Leone | 2014-6-11 |
| KM233063 | G3764   | Sierra Leone | 2014-6-12 |
| KM233064 | G3765.2 | Sierra Leone | 2014-6-14 |
| KM233065 | G3769.1 | Sierra Leone | 2014-6-12 |
| KM233069 | G3770.1 | Sierra Leone | 2014-6-12 |
| KM233071 | G3771   | Sierra Leone | 2014-6-12 |
| KM233072 | G3782   | Sierra Leone | 2014-6-14 |
| KM233073 | G3786   | Sierra Leone | 2014-6-14 |
| KM233074 | G3787   | Sierra Leone | 2014-6-14 |
| KM233075 | G3788   | Sierra Leone | 2014-6-14 |
| KM233076 | G3789.1 | Sierra Leone | 2014-6-14 |
| KM233077 | G3795   | Sierra Leone | 2014-6-15 |
| KM233078 | G3796   | Sierra Leone | 2014-6-15 |
| KM233079 | G3798   | Sierra Leone | 2014-6-15 |
| KM233080 | G3799   | Sierra Leone | 2014-6-15 |
| KM233081 | G3800   | Sierra Leone | 2014-6-15 |
| KM233082 | G3805.1 | Sierra Leone | 2014-6-15 |
| KM233084 | G3807   | Sierra Leone | 2014-6-15 |
| KM233085 | G3808   | Sierra Leone | 2014-6-15 |

|          |                |              |           |
|----------|----------------|--------------|-----------|
| KM233086 | G3809          | Sierra Leone | 2014-6-15 |
| KM233087 | G3810.1        | Sierra Leone | 2014-6-15 |
| KM233089 | G3814          | Sierra Leone | 2014-6-15 |
| KM233090 | G3816          | Sierra Leone | 2014-6-15 |
| KM233091 | G3817          | Sierra Leone | 2014-6-15 |
| KM233092 | G3818          | Sierra Leone | 2014-6-15 |
| KM233093 | G3819          | Sierra Leone | 2014-6-15 |
| KM233094 | G3820          | Sierra Leone | 2014-6-15 |
| KM233095 | G3821          | Sierra Leone | 2014-6-15 |
| KM233096 | G3822          | Sierra Leone | 2014-6-15 |
| KM233097 | G3823          | Sierra Leone | 2014-6-15 |
| KM233098 | G3825.1        | Sierra Leone | 2014-6-16 |
| KM233100 | G3826          | Sierra Leone | 2014-6-16 |
| KM233101 | G3827          | Sierra Leone | 2014-6-16 |
| KM233102 | G3829          | Sierra Leone | 2014-6-16 |
| KM233103 | G3831          | Sierra Leone | 2014-6-16 |
| KM233104 | G3834          | Sierra Leone | 2014-6-17 |
| KM233105 | G3838          | Sierra Leone | 2014-6-17 |
| KM233106 | G3840          | Sierra Leone | 2014-6-17 |
| KM233107 | G3841          | Sierra Leone | 2014-6-17 |
| KM233108 | G3845          | Sierra Leone | 2014-6-18 |
| KM233109 | G3846          | Sierra Leone | 2014-6-18 |
| KM233110 | G3848          | Sierra Leone | 2014-6-18 |
| KM233111 | G3850          | Sierra Leone | 2014-6-18 |
| KM233112 | G3851          | Sierra Leone | 2014-6-18 |
| KM233113 | G3856.1        | Sierra Leone | 2014-6-18 |
| KM233115 | G3857          | Sierra Leone | 2014-6-18 |
| KM233116 | NM042.1        | Sierra Leone | 2014-6-4  |
| KR534507 | Conakry-505    | Guinea       | 2014-7-24 |
| KR534508 | Conakry-509    | Guinea       | 2014-7-24 |
| KR534509 | Siguiiri-517   | Guinea       | 2014-7-24 |
| KR534510 | Kouroussa-531  | Guinea       | 2014-7-27 |
| KR534511 | Conakry-573    | Guinea       | 2014-8-2  |
| KR534512 | Gueckedou-633  | Guinea       | 2014-8-12 |
| KR534513 | Macenta-645    | Guinea       | 2014-8-14 |
| KR534514 | Conakry-653    | Guinea       | 2014-8-15 |
| KR534515 | Conakry-657    | Guinea       | 2014-8-16 |
| KR534516 | Conakry-678    | Guinea       | 2014-8-19 |
| KR534517 | Conakry-684    | Guinea       | 2014-8-20 |
| KR534518 | Conakry-691    | Guinea       | 2014-8-21 |
| KR534519 | Conakry-701    | Guinea       | 2014-8-22 |
| KR534520 | Conakry-740    | Guinea       | 2014-8-26 |
| KR534521 | Conakry-786    | Guinea       | 2014-8-28 |
| KR534522 | Conakry-787    | Guinea       | 2014-8-28 |
| KR534523 | Dubreka-789    | Guinea       | 2014-8-29 |
| KR534524 | Coyah-955      | Guinea       | 2014-9-11 |
| KR534525 | Conakry-976    | Guinea       | 2014-9-14 |
| KR534526 | Forecariah-989 | Guinea       | 2014-9-15 |

|          |                 |        |            |
|----------|-----------------|--------|------------|
| KR534527 | Conakry-1043    | Guinea | 2014-9-19  |
| KR534528 | Kindia-1047     | Guinea | 2014-9-20  |
| KR534529 | Conakry-1059    | Guinea | 2014-9-21  |
| KR534530 | Coyah-1063      | Guinea | 2014-9-21  |
| KR534531 | Forecariah-1069 | Guinea | 2014-9-21  |
| KR534532 | Conakry-1081    | Guinea | 2014-9-22  |
| KR534534 | Dalaba-1116     | Guinea | 2014-9-24  |
| KR534535 | Conakry-1120    | Guinea | 2014-9-25  |
| KR534536 | Conakry-1121    | Guinea | 2014-9-25  |
| KR534537 | Conakry-1193    | Guinea | 2014-9-28  |
| KR534538 | Conakry-1205    | Guinea | 2014-10-2  |
| KR534539 | Conakry-1210    | Guinea | 2014-10-2  |
| KR534540 | Dalaba-1211     | Guinea | 2014-10-2  |
| KR534541 | Conakry-1249    | Guinea | 2014-10-4  |
| KR534542 | Coyah-1274      | Guinea | 2014-10-4  |
| KR534543 | Coyah-1277      | Guinea | 2014-10-4  |
| KR534544 | Coyah-1278      | Guinea | 2014-10-4  |
| KR534545 | Conakry-1298    | Guinea | 2014-10-6  |
| KR534546 | Coyah-1316      | Guinea | 2014-10-7  |
| KR534548 | Kerouane-1331   | Guinea | 2014-10-7  |
| KR534549 | Coyah-1333      | Guinea | 2014-10-7  |
| KR534550 | Coyah-1339      | Guinea | 2014-10-8  |
| KR534551 | Conakry-1340    | Guinea | 2014-10-8  |
| KR534552 | Conakry-1342    | Guinea | 2014-10-8  |
| KR534553 | Coyah-1355      | Guinea | 2014-10-9  |
| KR534554 | Forecariah-1365 | Guinea | 2014-10-9  |
| KR534555 | Conakry-1371    | Guinea | 2014-10-10 |
| KR534556 | Coyah-1374      | Guinea | 2014-10-10 |
| KR534557 | Coyah-1394      | Guinea | 2014-10-11 |
| KR534558 | Coyah-1436      | Guinea | 2014-10-13 |
| KR534559 | Conakry-1445    | Guinea | 2014-10-14 |
| KR534560 | Conakry-1454    | Guinea | 2014-10-14 |
| KR534561 | Conakry-1480    | Guinea | 2014-10-15 |
| KR534562 | Conakry-1551    | Guinea | 2014-10-18 |
| KR534563 | Conakry-1561    | Guinea | 2014-10-19 |
| KR534564 | Forecariah-1567 | Guinea | 2014-10-18 |
| KR534565 | Forecariah-1568 | Guinea | 2014-10-18 |
| KR534566 | Forecariah-1571 | Guinea | 2014-10-20 |
| KR534567 | Nzeerekore-1622 | Guinea | 2014-10-22 |
| KR534568 | Forecariah-1623 | Guinea | 2014-10-24 |
| KR534569 | Kindia-1648     | Guinea | 2014-10-23 |
| KR534570 | Conakry-1651    | Guinea | 2014-10-24 |
| KR534571 | Coyah-1652      | Guinea | 2014-10-24 |
| KR534572 | Coyah-1686      | Guinea | 2014-10-24 |
| KR534573 | Coyah-1689      | Guinea | 2014-10-25 |
| KR534574 | Coyah-1690      | Guinea | 2014-10-25 |
| KR534575 | Conakry-1481    | Guinea | 2014-10-15 |
| KR534576 | Conakry-1491    | Guinea | 2014-10-16 |



|          |              |              |            |
|----------|--------------|--------------|------------|
| KR534577 | Conakry-1027 | Guinea       | 2014-9-18  |
| KR534578 | Conakry-1039 | Guinea       | 2014-9-19  |
| KR534579 | Conakry-1105 | Guinea       | 2014-9-24  |
| KR534580 | Conakry-1128 | Guinea       | 2014-9-25  |
| KR534581 | Conakry-1129 | Guinea       | 2014-9-25  |
| KR534582 | Conakry-1149 | Guinea       | 2014-9-27  |
| KR534583 | Conakry-1213 | Guinea       | 2014-10-2  |
| KR534584 | Conakry-1215 | Guinea       | 2014-10-2  |
| KR534585 | Conakry-1250 | Guinea       | 2014-10-4  |
| KR534586 | Conakry-507  | Guinea       | 2014-7-24  |
| KR534587 | Conakry-742  | Guinea       | 2014-8-26  |
| KR534588 | Conakry-768  | Guinea       | 2014-8-27  |
| KR534589 | Coyah-1279   | Guinea       | 2014-10-4  |
| KR534590 | Coyah-1320   | Guinea       | 2014-10-7  |
| KR534591 | Coyah-1327   | Guinea       | 2014-10-7  |
| KP759594 | J0109        | Sierra Leone | 2014-10-31 |
| KP759595 | J0111        | Sierra Leone | 2014-10-30 |
| KP759596 | J0114        | Sierra Leone | 2014-10-29 |
| KP759597 | J0115        | Sierra Leone | 2014-10-29 |
| KP759598 | J0118        | Sierra Leone | 2014-10-31 |
| KP759599 | J0120        | Sierra Leone | 2014-10-30 |
| KP759600 | J0129        | Sierra Leone | 2014-11-2  |
| KP759601 | J0132        | Sierra Leone | 2014-11-2  |
| KP759602 | J0135        | Sierra Leone | 2014-11-3  |
| KP759603 | J0140        | Sierra Leone | 2014-10-30 |
| KP759604 | J0143        | Sierra Leone | 2014-11-4  |
| KP759605 | J0144        | Sierra Leone | 2014-11-4  |
| KP759606 | J0030        | Sierra Leone | 2014-10-3  |
| KP759607 | J0031        | Sierra Leone | 2014-10-3  |
| KP759608 | J0034        | Sierra Leone | 2014-9-30  |
| KP759609 | J0035        | Sierra Leone | 2014-10-1  |
| KP759610 | J0146        | Sierra Leone | 2014-11-7  |
| KP759611 | J0147        | Sierra Leone | 2014-11-7  |
| KP759612 | J0148        | Sierra Leone | 2014-11-6  |
| KP759613 | J0151        | Sierra Leone | 2014-11-7  |
| KP759614 | J0152        | Sierra Leone | 2014-11-7  |
| KP759615 | J0037        | Sierra Leone | 2014-10-3  |
| KP759616 | J0153        | Sierra Leone | 2014-11-7  |
| KP759617 | J0154        | Sierra Leone | 2014-11-7  |
| KP759618 | J0038        | Sierra Leone | 2014-9-30  |
| KP759619 | J0159        | Sierra Leone | 2014-11-5  |
| KP759620 | J0039        | Sierra Leone | 2014-10-3  |
| KP759621 | J0160        | Sierra Leone | 2014-11-7  |
| KP759622 | J0162        | Sierra Leone | 2014-11-9  |
| KP759623 | J0164        | Sierra Leone | 2014-11-9  |
| KP759624 | J0167        | Sierra Leone | 2014-11-8  |
| KP759625 | J0170        | Sierra Leone | 2014-11-10 |
| KP759626 | J0172        | Sierra Leone | 2014-11-11 |

|          |       |              |            |
|----------|-------|--------------|------------|
| KP759627 | J0173 | Sierra Leone | 2014-11-11 |
| KP759628 | J0005 | Sierra Leone | 2014-9-26  |
| KP759629 | J0040 | Sierra Leone | 2014-10-4  |
| KP759630 | J0006 | Sierra Leone | 2014-9-28  |
| KP759631 | J0007 | Sierra Leone | 2014-9-27  |
| KP759632 | J0047 | Sierra Leone | 2014-10-5  |
| KP759633 | J0051 | Sierra Leone | 2014-10-7  |
| KP759634 | J0056 | Sierra Leone | 2014-10-8  |
| KP759635 | J0057 | Sierra Leone | 2014-10-5  |
| KP759636 | J0001 | Sierra Leone | 2014-9-27  |
| KP759637 | J0061 | Sierra Leone | 2014-10-10 |
| KP759638 | J0063 | Sierra Leone | 2014-10-10 |
| KP759639 | J0010 | Sierra Leone | 2014-9-28  |
| KP759640 | J0002 | Sierra Leone | 2014-9-27  |
| KP759641 | J0011 | Sierra Leone | 2014-9-29  |
| KP759642 | J0012 | Sierra Leone | 2014-9-29  |
| KP759643 | J0013 | Sierra Leone | 2014-9-28  |
| KP759644 | J0018 | Sierra Leone | 2014-9-30  |
| KP759645 | J0085 | Sierra Leone | 2014-10-17 |
| KP759646 | J0086 | Sierra Leone | 2014-10-23 |
| KP759647 | J0087 | Sierra Leone | 2014-10-23 |
| KP759648 | J0088 | Sierra Leone | 2014-10-20 |
| KP759649 | J0090 | Sierra Leone | 2014-10-23 |
| KP759650 | J0092 | Sierra Leone | 2014-10-25 |
| KP759651 | J0003 | Sierra Leone | 2014-9-28  |
| KP759652 | J0023 | Sierra Leone | 2014-10-1  |
| KP759653 | J0095 | Sierra Leone | 2014-10-27 |
| KP759654 | J0096 | Sierra Leone | 2014-10-27 |
| KP759655 | J0100 | Sierra Leone | 2014-10-26 |
| KP759656 | J0101 | Sierra Leone | 2014-10-29 |
| KP759657 | J0102 | Sierra Leone | 2014-10-27 |
| KP759658 | J0103 | Sierra Leone | 2014-10-29 |
| KP759659 | J0108 | Sierra Leone | 2014-10-28 |
| KP759660 | J0110 | Sierra Leone | 2014-10-31 |
| KP759661 | J0112 | Sierra Leone | 2014-10-31 |
| KP759662 | J0113 | Sierra Leone | 2014-10-30 |
| KP759663 | J0024 | Sierra Leone | 2014-9-29  |
| KP759664 | J0116 | Sierra Leone | 2014-10-30 |
| KP759665 | J0117 | Sierra Leone | 2014-10-31 |
| KP759666 | J0025 | Sierra Leone | 2014-10-2  |
| KP759667 | J0119 | Sierra Leone | 2014-10-30 |
| KP759668 | J0004 | Sierra Leone | 2014-9-28  |
| KP759669 | J0121 | Sierra Leone | 2014-10-29 |
| KP759670 | J0026 | Sierra Leone | 2014-10-2  |
| KP759671 | J0122 | Sierra Leone | 2014-10-29 |
| KP759672 | J0123 | Sierra Leone | 2014-11-1  |
| KP759673 | J0124 | Sierra Leone | 2014-11-2  |
| KP759674 | J0125 | Sierra Leone | 2014-10-31 |

|          |       |              |            |
|----------|-------|--------------|------------|
| KP759675 | J0126 | Sierra Leone | 2014-10-31 |
| KP759676 | J0127 | Sierra Leone | 2014-10-30 |
| KP759677 | J0128 | Sierra Leone | 2014-10-31 |
| KP759678 | J0027 | Sierra Leone | 2014-10-2  |
| KP759679 | J0130 | Sierra Leone | 2014-11-2  |
| KP759680 | J0131 | Sierra Leone | 2014-10-30 |
| KP759681 | J0133 | Sierra Leone | 2014-10-31 |
| KP759682 | J0134 | Sierra Leone | 2014-10-31 |
| KP759683 | J0028 | Sierra Leone | 2014-10-2  |
| KP759684 | J0136 | Sierra Leone | 2014-11-1  |
| KP759685 | J0137 | Sierra Leone | 2014-11-1  |
| KP759686 | J0138 | Sierra Leone | 2014-11-1  |
| KP759687 | J0139 | Sierra Leone | 2014-10-30 |
| KP759688 | J0029 | Sierra Leone | 2014-9-29  |
| KP759689 | J0141 | Sierra Leone | 2014-11-4  |
| KP759690 | J0142 | Sierra Leone | 2014-11-3  |
| KP759691 | J0032 | Sierra Leone | 2014-9-30  |
| KP759692 | J0033 | Sierra Leone | 2014-10-3  |
| KP759693 | J0145 | Sierra Leone | 2014-11-6  |
| KP759694 | J0036 | Sierra Leone | 2014-10-3  |
| KP759695 | J0149 | Sierra Leone | 2014-11-7  |
| KP759696 | J0150 | Sierra Leone | 2014-11-6  |
| KP759697 | J0155 | Sierra Leone | 2014-11-7  |
| KP759698 | J0156 | Sierra Leone | 2014-11-7  |
| KP759699 | J0157 | Sierra Leone | 2014-11-6  |
| KP759700 | J0158 | Sierra Leone | 2014-11-8  |
| KP759701 | J0161 | Sierra Leone | 2014-11-8  |
| KP759702 | J0163 | Sierra Leone | 2014-11-8  |
| KP759703 | J0165 | Sierra Leone | 2014-11-8  |
| KP759704 | J0166 | Sierra Leone | 2014-11-8  |
| KP759705 | J0168 | Sierra Leone | 2014-11-11 |
| KP759706 | J0169 | Sierra Leone | 2014-11-9  |
| KP759707 | J0171 | Sierra Leone | 2014-11-10 |
| KP759708 | J0174 | Sierra Leone | 2014-11-11 |
| KP759709 | J0175 | Sierra Leone | 2014-11-11 |
| KP759710 | J0041 | Sierra Leone | 2014-10-4  |
| KP759711 | J0042 | Sierra Leone | 2014-10-4  |
| KP759712 | J0043 | Sierra Leone | 2014-10-4  |
| KP759713 | J0044 | Sierra Leone | 2014-10-5  |
| KP759714 | J0045 | Sierra Leone | 2014-10-5  |
| KP759715 | J0046 | Sierra Leone | 2014-10-7  |
| KP759716 | J0048 | Sierra Leone | 2014-10-5  |
| KP759717 | J0049 | Sierra Leone | 2014-10-7  |
| KP759718 | J0008 | Sierra Leone | 2014-9-29  |
| KP759719 | J0050 | Sierra Leone | 2014-10-5  |
| KP759720 | J0052 | Sierra Leone | 2014-10-8  |
| KP759721 | J0053 | Sierra Leone | 2014-10-6  |
| KP759722 | J0054 | Sierra Leone | 2014-10-6  |

|          |          |              |            |
|----------|----------|--------------|------------|
| KP759723 | J0055    | Sierra Leone | 2014-10-6  |
| KP759724 | J0058    | Sierra Leone | 2014-10-8  |
| KP759725 | J0059    | Sierra Leone | 2014-10-8  |
| KP759726 | J0060    | Sierra Leone | 2014-10-6  |
| KP759727 | J0062    | Sierra Leone | 2014-10-10 |
| KP759728 | J0064    | Sierra Leone | 2014-10-9  |
| KP759729 | J0065    | Sierra Leone | 2014-10-9  |
| KP759730 | J0066    | Sierra Leone | 2014-10-10 |
| KP759731 | J0067    | Sierra Leone | 2014-10-9  |
| KP759732 | J0068    | Sierra Leone | 2014-10-9  |
| KP759733 | J0069    | Sierra Leone | 2014-10-9  |
| KP759734 | J0009    | Sierra Leone | 2014-9-28  |
| KP759735 | J0070    | Sierra Leone | 2014-10-9  |
| KP759736 | J0071    | Sierra Leone | 2014-10-9  |
| KP759737 | J0072    | Sierra Leone | 2014-10-9  |
| KP759738 | J0073    | Sierra Leone | 2014-10-12 |
| KP759739 | J0074    | Sierra Leone | 2014-10-13 |
| KP759740 | J0014    | Sierra Leone | 2014-9-29  |
| KP759741 | J0015    | Sierra Leone | 2014-9-26  |
| KP759742 | J0016    | Sierra Leone | 2014-9-30  |
| KP759743 | J0075    | Sierra Leone | 2014-10-17 |
| KP759744 | J0076    | Sierra Leone | 2014-10-17 |
| KP759745 | J0077    | Sierra Leone | 2014-10-17 |
| KP759746 | J0078    | Sierra Leone | 2014-10-18 |
| KP759747 | J0017    | Sierra Leone | 2014-9-26  |
| KP759748 | J0079    | Sierra Leone | 2014-10-16 |
| KP759749 | J0080    | Sierra Leone | 2014-10-18 |
| KP759750 | J0081    | Sierra Leone | 2014-10-16 |
| KP759751 | J0082    | Sierra Leone | 2014-10-16 |
| KP759752 | J0083    | Sierra Leone | 2014-10-18 |
| KP759753 | J0084    | Sierra Leone | 2014-10-16 |
| KP759754 | J0019    | Sierra Leone | 2014-9-25  |
| KP759755 | J0020    | Sierra Leone | 2014-9-25  |
| KP759756 | J0021    | Sierra Leone | 2014-9-29  |
| KP759757 | J0022    | Sierra Leone | 2014-9-25  |
| KP759758 | J0089    | Sierra Leone | 2014-10-23 |
| KP759759 | J0091    | Sierra Leone | 2014-10-25 |
| KP759760 | J0093    | Sierra Leone | 2014-10-24 |
| KP759761 | J0094    | Sierra Leone | 2014-10-27 |
| KP759762 | J0097    | Sierra Leone | 2014-10-28 |
| KP759763 | J0098    | Sierra Leone | 2014-10-28 |
| KP759764 | J0099    | Sierra Leone | 2014-10-28 |
| KP759765 | J0104    | Sierra Leone | 2014-10-29 |
| KP759766 | J0105    | Sierra Leone | 2014-10-29 |
| KP759767 | J0106    | Sierra Leone | 2014-10-28 |
| KP759768 | J0107    | Sierra Leone | 2014-10-29 |
| KR817067 | EM000015 | Guinea       | 2014-9-1   |
| KR817068 | EM000027 | Guinea       | 2014-9-1   |

|          |          |         |            |
|----------|----------|---------|------------|
| KR817069 | EM000028 | Guinea  | 2014-9-1   |
| KR817070 | EM000127 | Guinea  | 2014-9-4   |
| KR817071 | EM000128 | Guinea  | 2014-9-4   |
| KR817072 | EM000218 | Guinea  | 2014-9-7   |
| KR817073 | EM000219 | Guinea  | 2014-9-7   |
| KR817074 | EM000321 | Guinea  | 2014-9-9   |
| KR817075 | EM000457 | Guinea  | 2014-9-12  |
| KR817076 | EM000500 | Guinea  | 2014-9-13  |
| KR817077 | EM000501 | Guinea  | 2014-9-13  |
| KR817078 | EM000502 | Guinea  | 2014-9-13  |
| KR817079 | EM000706 | Guinea  | 2014-9-21  |
| KR817080 | EM000707 | Guinea  | 2014-9-22  |
| KR817081 | EM000921 | Guinea  | 2014-9-29  |
| KR817082 | EM000925 | Guinea  | 2014-9-29  |
| KR817083 | EM000934 | Guinea  | 2014-9-29  |
| KR817084 | EM000958 | Guinea  | 2014-9-30  |
| KR817085 | EM000968 | Guinea  | 2014-10-1  |
| KR817086 | EM000982 | Guinea  | 2014-10-1  |
| KR817087 | EM000983 | Guinea  | 2014-10-1  |
| KR817088 | EM001101 | Guinea  | 2014-10-5  |
| KR817089 | EM001102 | Guinea  | 2014-10-5  |
| KR817090 | EM004059 | Guinea  | 2014-12-20 |
| KR817091 | EM004085 | Guinea  | 2014-12-19 |
| KR817092 | EM004192 | Guinea  | 2014-12-22 |
| KR817093 | EM004201 | Guinea  | 2014-12-24 |
| KR817094 | EM004259 | Guinea  | 2014-12-26 |
| KR817095 | EM004290 | Guinea  | 2014-12-27 |
| KR817096 | EM004414 | Guinea  | 2015-1-2   |
| KR817097 | EM004422 | Guinea  | 2015-1-2   |
| KR817098 | EM004437 | Guinea  | 2015-1-4   |
| KR817099 | EM004438 | Guinea  | 2015-1-4   |
| KR817100 | EM004481 | Guinea  | 2015-1-11  |
| KR817101 | EM004494 | Guinea  | 2015-1-14  |
| KR817102 | EM004503 | Guinea  | 2015-1-15  |
| KR817103 | EM004555 | Guinea  | 2015-1-22  |
| KR817104 | EM004563 | Guinea  | 2015-1-25  |
| KR817105 | EM004580 | Guinea  | 2015-1-27  |
| KR817106 | EM004589 | Guinea  | 2015-1-31  |
| KR817107 | EM074335 | Guinea  | 2014-7-18  |
| KR817108 | EM074349 | Liberia | 2014-7-22  |
| KR817109 | EM074350 | Liberia | 2014-7-22  |
| KR817110 | EM074351 | Liberia | 2014-7-22  |
| KR817111 | EM074352 | Liberia | 2014-7-22  |
| KR817112 | EM074353 | Liberia | 2014-7-22  |
| KR817113 | EM074354 | Guinea  | 2014-7-22  |
| KR817114 | EM074391 | Liberia | 2014-7-26  |
| KR817115 | EM074392 | Liberia | 2014-7-25  |
| KR817116 | EM074436 | Guinea  | 2014-8-1   |

|          |          |         |            |
|----------|----------|---------|------------|
| KR817117 | EM074437 | Guinea  | 2014-8-1   |
| KR817118 | EM074438 | Guinea  | 2014-8-1   |
| KR817119 | EM074439 | Guinea  | 2014-8-1   |
| KR817120 | EM074461 | Guinea  | 2014-8-4   |
| KR817121 | EM074462 | Guinea  | 2014-8-4   |
| KR817122 | EM074531 | Guinea  | 2014-8-8   |
| KR817123 | EM074548 | Liberia | 2014-8-8   |
| KR817124 | EM074684 | Guinea  | 2014-8-14  |
| KR817125 | EM074720 | Liberia | 2014-8-14  |
| KR817126 | EM074785 | Guinea  | 2014-8-16  |
| KR817127 | EM074821 | Liberia | 2014-8-17  |
| KR817128 | EM074822 | Liberia | 2014-8-17  |
| KR817129 | EM075043 | Liberia | 2014-8-22  |
| KR817130 | EM075076 | Guinea  | 2014-8-23  |
| KR817131 | EM075368 | Guinea  | 2014-8-29  |
| KR817132 | EM075373 | Guinea  | 2014-8-30  |
| KR817133 | EM075435 | Guinea  | 2014-8-30  |
| KR817134 | EM075447 | Guinea  | 2014-8-31  |
| KR817135 | EM075928 | Guinea  | 2014-10-10 |
| KR817136 | EM075929 | Guinea  | 2014-10-10 |
| KR817137 | EM075930 | Guinea  | 2014-10-10 |
| KR817138 | EM075931 | Guinea  | 2014-10-10 |
| KR817139 | EM075932 | Guinea  | 2014-10-10 |
| KR817140 | EM076138 | Guinea  | 2014-10-17 |
| KR817141 | EM076191 | Guinea  | 2014-10-18 |
| KR817142 | EM076192 | Guinea  | 2014-10-18 |
| KR817143 | EM076193 | Guinea  | 2014-10-18 |
| KR817144 | EM076217 | Guinea  | 2014-10-19 |
| KR817145 | EM076322 | Guinea  | 2014-10-22 |
| KR817146 | EM076334 | Guinea  | 2014-10-23 |
| KR817147 | EM076335 | Guinea  | 2014-10-23 |
| KR817148 | EM076383 | Guinea  | 2014-10-26 |
| KR817149 | EM076403 | Guinea  | 2014-10-27 |
| KR817150 | EM076472 | Guinea  | 2014-10-29 |
| KR817151 | EM076533 | Guinea  | 2014-11-1  |
| KR817152 | EM076534 | Guinea  | 2014-11-1  |
| KR817153 | EM076610 | Guinea  | 2014-11-3  |
| KR817155 | EM076769 | Guinea  | 2014-11-8  |
| KR817156 | EM076770 | Guinea  | 2014-11-8  |
| KR817157 | EM076948 | Guinea  | 2014-11-13 |
| KR817158 | EM076949 | Guinea  | 2014-11-13 |
| KR817159 | EM076951 | Guinea  | 2014-11-13 |
| KR817160 | EM078415 | Guinea  | 2014-11-24 |
| KR817161 | EM078416 | Guinea  | 2014-11-24 |
| KR817162 | EM078555 | Guinea  | 2014-12-1  |
| KR817163 | EM078556 | Guinea  | 2014-12-1  |
| KR817164 | EM078608 | Guinea  | 2014-12-4  |
| KR817165 | EM078638 | Guinea  | 2014-12-3  |

|          |          |         |            |
|----------|----------|---------|------------|
| KR817166 | EM078639 | Guinea  | 2014-12-4  |
| KR817167 | EM078654 | Guinea  | 2014-12-9  |
| KR817168 | EM078656 | Guinea  | 2014-12-9  |
| KR817169 | EM078670 | Guinea  | 2014-12-11 |
| KR817170 | EM078683 | Guinea  | 2014-12-11 |
| KR817171 | EM078694 | Guinea  | 2014-12-14 |
| KR817172 | EM078697 | Guinea  | 2014-12-14 |
| KR817173 | EM078706 | Guinea  | 2014-12-15 |
| KR817174 | EM078709 | Guinea  | 2014-12-14 |
| KR817175 | EM078722 | Guinea  | 2014-12-16 |
| KR817176 | EM078763 | Guinea  | 2014-12-17 |
| KR817177 | EM078779 | Guinea  | 2014-12-18 |
| KR817179 | EM079404 | Guinea  | 2014-3-28  |
| KR817180 | EM079405 | Guinea  | 2014-3-28  |
| KR817181 | EM079408 | Guinea  | 2014-3-31  |
| KR817182 | EM079410 | Guinea  | 2014-3-31  |
| KR817183 | EM079412 | Guinea  | 2014-3-31  |
| KR817184 | EM079413 | Guinea  | 2014-3-31  |
| KR817185 | EM079414 | Guinea  | 2014-3-31  |
| KR817186 | EM079421 | Guinea  | 2014-3-30  |
| KR817187 | EM079422 | Guinea  | 2014-3-27  |
| KR817188 | EM079423 | Guinea  | 2014-3-27  |
| KR817189 | EM079424 | Guinea  | 2014-3-27  |
| KR817190 | EM079429 | Guinea  | 2014-4-2   |
| KR817191 | EM079434 | Guinea  | 2014-4-2   |
| KR817192 | EM079442 | Guinea  | 2014-4-3   |
| KR817193 | EM079444 | Guinea  | 2014-4-2   |
| KR817194 | EM079450 | Liberia | 2014-4-1   |
| KR817195 | EM079464 | Guinea  | 2014-4-4   |
| KR817196 | EM079497 | Guinea  | 2014-4-7   |
| KR817197 | EM079514 | Guinea  | 2014-4-10  |
| KR817198 | EM079517 | Guinea  | 2014-4-11  |
| KR817199 | EM079542 | Guinea  | 2014-4-12  |
| KR817200 | EM079549 | Guinea  | 2014-4-13  |
| KR817201 | EM079578 | Guinea  | 2014-4-18  |
| KR817202 | EM079587 | Guinea  | 2014-4-22  |
| KR817203 | EM079622 | Guinea  | 2014-4-28  |
| KR817204 | EM079630 | Guinea  | 2014-5-1   |
| KR817205 | EM079657 | Guinea  | 2014-5-7   |
| KR817206 | EM079659 | Guinea  | 2014-5-7   |
| KR817207 | EM079677 | Guinea  | 2014-5-10  |
| KR817208 | EM079681 | Guinea  | 2014-5-11  |
| KR817209 | EM079685 | Guinea  | 2014-5-11  |
| KR817210 | EM079702 | Guinea  | 2014-5-14  |
| KR817211 | EM079731 | Guinea  | 2014-5-18  |
| KR817212 | EM079749 | Guinea  | 2014-5-21  |
| KR817213 | EM079750 | Guinea  | 2014-5-21  |
| KR817214 | EM079753 | Guinea  | 2014-5-22  |

|          |          |              |           |
|----------|----------|--------------|-----------|
| KR817215 | EM079772 | Guinea       | 2014-5-24 |
| KR817216 | EM079775 | Guinea       | 2014-5-24 |
| KR817217 | EM079815 | Guinea       | 2014-5-28 |
| KR817218 | EM079859 | Guinea       | 2014-6-1  |
| KR817219 | EM079876 | Guinea       | 2014-6-5  |
| KR817220 | EM079880 | Guinea       | 2014-6-5  |
| KR817221 | EM079910 | Guinea       | 2014-6-9  |
| KR817222 | EM079911 | Guinea       | 2014-6-9  |
| KR817223 | EM079912 | Guinea       | 2014-6-9  |
| KR817224 | EM079913 | Guinea       | 2014-6-9  |
| KR817225 | EM079914 | Guinea       | 2014-6-10 |
| KR817226 | EM079915 | Guinea       | 2014-6-10 |
| KR817227 | EM079983 | Sierra Leone | 2014-6-13 |
| KR817228 | EM080003 | Sierra Leone | 2014-6-14 |
| KR817229 | EM080011 | Sierra Leone | 2014-6-15 |
| KR817230 | EM080063 | Guinea       | 2014-6-20 |
| KR817231 | EM080064 | Liberia      | 2014-6-20 |
| KR817232 | EM080065 | Liberia      | 2014-6-20 |
| KR817233 | EM080066 | Liberia      | 2014-6-20 |
| KR817234 | EM080067 | Liberia      | 2014-6-20 |
| KR817235 | EM080076 | Guinea       | 2014-6-22 |
| KR817236 | EM080132 | Sierra Leone | 2014-6-24 |
| KR817237 | EM080141 | Guinea       | 2014-6-25 |
| KR817238 | EM080165 | Sierra Leone | 2014-6-26 |
| KR817239 | EM080193 | Liberia      | 2014-6-29 |
| KR817240 | EM080213 | Liberia      | 2014-7-3  |
| KR817242 | EM080253 | Guinea       | 2014-7-10 |
| KR817243 | EM080261 | Liberia      | 2014-7-12 |
| KR817244 | EM080265 | Sierra Leone | 2014-7-12 |
| KR817245 | EM080269 | Liberia      | 2014-7-12 |
| KR105200 | G3838.2  | Sierra Leone | 2014-6-16 |
| KR105202 | G3851.2  | Sierra Leone | 2014-6-18 |
| KR105204 | G3886.1  | Sierra Leone | 2014-6-19 |
| KR105205 | G3889.1  | Sierra Leone | 2014-6-19 |
| KR105206 | G3913.1  | Sierra Leone | 2014-6-21 |
| KR105207 | G3917.1  | Sierra Leone | 2014-6-21 |
| KR105208 | G3926.2  | Sierra Leone | 2014-6-22 |
| KR105209 | G3949.1  | Sierra Leone | 2014-6-24 |
| KR105210 | G3950.1  | Sierra Leone | 2014-6-24 |
| KR105213 | G4132.1  | Sierra Leone | 2014-7-5  |
| KR105214 | G4133.1  | Sierra Leone | 2014-7-4  |
| KR105215 | G4151.1  | Sierra Leone | 2014-7-6  |
| KR105216 | G4190.1  | Sierra Leone | 2014-7-7  |
| KR105217 | G4200.1  | Sierra Leone | 2014-7-8  |
| KR105218 | G4217.1  | Sierra Leone | 2014-7-8  |
| KR105219 | G4221.1  | Sierra Leone | 2014-7-9  |
| KR105221 | G4236.1  | Sierra Leone | 2014-7-10 |
| KR105222 | G4250.1  | Sierra Leone | 2014-7-11 |



|          |         |              |           |
|----------|---------|--------------|-----------|
| KR105223 | G4251.1 | Sierra Leone | 2014-7-11 |
| KR105224 | G4252.1 | Sierra Leone | 2014-7-11 |
| KR105225 | G4254.1 | Sierra Leone | 2014-7-11 |
| KR105226 | G4255.1 | Sierra Leone | 2014-7-11 |
| KR105227 | G4263.1 | Sierra Leone | 2014-7-11 |
| KR105228 | G4264.1 | Sierra Leone | 2014-7-11 |
| KR105229 | G4299.1 | Sierra Leone | 2014-7-12 |
| KR105230 | G4312.2 | Sierra Leone | 2014-7-12 |
| KR105231 | G4316.1 | Sierra Leone | 2014-7-13 |
| KR105232 | G4323.2 | Sierra Leone | 2014-7-14 |
| KR105233 | G4324.1 | Sierra Leone | 2014-7-14 |
| KR105234 | G4325.1 | Sierra Leone | 2014-7-14 |
| KR105235 | G4329.1 | Sierra Leone | 2014-7-14 |
| KR105236 | G4333.1 | Sierra Leone | 2014-7-13 |
| KR105237 | G4334.1 | Sierra Leone | 2014-7-14 |
| KR105238 | G4337.1 | Sierra Leone | 2014-7-14 |
| KR105239 | G4345.1 | Sierra Leone | 2014-7-18 |
| KR105240 | G4347.1 | Sierra Leone | 2014-7-15 |
| KR105241 | G4348.1 | Sierra Leone | 2014-7-9  |
| KR105242 | G4350.1 | Sierra Leone | 2014-7-14 |
| KR105243 | G4380.1 | Sierra Leone | 2014-7-15 |
| KR105244 | G4382.1 | Sierra Leone | 2014-7-16 |
| KR105247 | G4415.1 | Sierra Leone | 2014-7-18 |
| KR105248 | G4416.1 | Sierra Leone | 2014-7-18 |
| KR105249 | G4419.1 | Sierra Leone | 2014-7-19 |
| KR105250 | G4422.1 | Sierra Leone | 2014-7-19 |
| KR105251 | G4423.1 | Sierra Leone | 2014-7-19 |
| KR105252 | G4424.1 | Sierra Leone | 2014-7-19 |
| KR105256 | G4445.1 | Sierra Leone | 2014-7-21 |
| KR105258 | G4454.1 | Sierra Leone | 2014-7-21 |
| KR105262 | G4683.1 | Sierra Leone | 2014-8-1  |
| KR105263 | G4698.1 | Sierra Leone | 2014-8-3  |
| KR105264 | G4701.1 | Sierra Leone | 2014-8-3  |
| KR105265 | G4702.1 | Sierra Leone | 2014-8-3  |
| KR105266 | G4717.1 | Sierra Leone | 2014-8-4  |
| KR105268 | G4730.1 | Sierra Leone | 2014-8-5  |
| KR105269 | G4736.1 | Sierra Leone | 2014-8-5  |
| KR105270 | G4748.1 | Sierra Leone | 2014-8-5  |
| KR105271 | G4751.1 | Sierra Leone | 2014-8-5  |
| KR105273 | G4856.1 | Sierra Leone | 2014-8-10 |
| KR105274 | G4861.1 | Sierra Leone | 2014-8-10 |
| KR105275 | G4868.1 | Sierra Leone | 2014-8-10 |
| KR105276 | G4886.1 | Sierra Leone | 2014-8-11 |
| KR105277 | G4907.1 | Sierra Leone | 2014-8-12 |
| KR105278 | G4937.1 | Sierra Leone | 2014-8-13 |
| KR105279 | G4942.1 | Sierra Leone | 2014-8-12 |
| KR105280 | G4946.1 | Sierra Leone | 2014-8-13 |
| KR105281 | G4955.1 | Sierra Leone | 2014-8-13 |

|          |         |              |           |
|----------|---------|--------------|-----------|
| KR105283 | G4960.1 | Sierra Leone | 2014-8-14 |
| KR105284 | G4971.1 | Sierra Leone | 2014-8-14 |
| KR105285 | G4972.1 | Sierra Leone | 2014-8-14 |
| KR105286 | G4973.1 | Sierra Leone | 2014-8-12 |
| KR105287 | G4981.1 | Sierra Leone | 2014-8-14 |
| KR105288 | G4982.1 | Sierra Leone | 2014-8-14 |
| KR105289 | G4994.1 | Sierra Leone | 2014-8-15 |
| KR105290 | G4996.1 | Sierra Leone | 2014-8-15 |
| KR105291 | G4999.1 | Sierra Leone | 2014-8-15 |
| KR105292 | G5012.3 | Sierra Leone | 2014-8-15 |
| KR105293 | G5016.1 | Sierra Leone | 2014-8-16 |
| KR105294 | G5019.1 | Sierra Leone | 2014-8-16 |
| KR105295 | G5039.1 | Sierra Leone | 2014-8-17 |
| KR105298 | G5112.1 | Sierra Leone | 2014-8-19 |
| KR105300 | G5119.1 | Sierra Leone | 2014-8-24 |
| KR105301 | G5244.1 | Sierra Leone | 2014-8-22 |
| KR105303 | G5296.1 | Sierra Leone | 2014-8-25 |
| KR105306 | G5370.1 | Sierra Leone | 2014-8-28 |
| KR105307 | G5516.1 | Sierra Leone | 2014-9-4  |
| KR105308 | G5520.1 | Sierra Leone | 2014-9-5  |
| KR105310 | G5570.1 | Sierra Leone | 2014-9-8  |
| KR105311 | G5571.1 | Sierra Leone | 2014-9-8  |
| KR105312 | G5617.1 | Sierra Leone | 2014-9-10 |
| KR105313 | G5640.1 | Sierra Leone | 2014-9-11 |
| KR105315 | G5647.1 | Sierra Leone | 2014-9-11 |
| KR105316 | G5684.1 | Sierra Leone | 2014-9-13 |
| KR105317 | G5685.1 | Sierra Leone | 2014-9-13 |
| KR105318 | G5691.1 | Sierra Leone | 2014-9-14 |
| KR105320 | G5731.1 | Sierra Leone | 2014-9-16 |
| KR105321 | G5737.1 | Sierra Leone | 2014-9-16 |
| KR105322 | G5738.1 | Sierra Leone | 2014-9-15 |
| KR105323 | G5743.1 | Sierra Leone | 2014-9-17 |
| KR105324 | G5756.1 | Sierra Leone | 2014-9-18 |
| KR105325 | G5763.1 | Sierra Leone | 2014-9-16 |
| KR105326 | G5765.1 | Sierra Leone | 2014-9-16 |
| KR105327 | G5767.1 | Sierra Leone | 2014-9-16 |
| KR105328 | G5844.1 | Sierra Leone | 2014-9-21 |
| KR105329 | G5853.1 | Sierra Leone | 2014-9-21 |
| KR105330 | G5879.1 | Sierra Leone | 2014-9-22 |
| KR105331 | G5898.1 | Sierra Leone | 2014-9-22 |
| KR105332 | G5982.1 | Sierra Leone | 2014-9-25 |
| KR105333 | G5983.1 | Sierra Leone | 2014-9-25 |
| KR105335 | G5986.1 | Sierra Leone | 2014-9-25 |
| KR105337 | G5996.1 | Sierra Leone | 2014-9-25 |
| KR105338 | G5997.1 | Sierra Leone | 2014-9-25 |
| KR105339 | G5998.1 | Sierra Leone | 2014-9-25 |
| KR105340 | G6012.1 | Sierra Leone | 2014-9-25 |
| KR105341 | G6020.1 | Sierra Leone | 2014-9-25 |

|          |          |              |            |
|----------|----------|--------------|------------|
| KR105342 | G6060.1  | Sierra Leone | 2014-9-25  |
| KR105343 | G6062.1  | Sierra Leone | 2014-9-25  |
| KR105344 | G6069.1  | Sierra Leone | 2014-9-25  |
| KR105345 | G6089.1  | Sierra Leone | 2014-9-27  |
| KR105346 | G6091.1  | Sierra Leone | 2014-9-27  |
| KR105347 | G6095.1  | Sierra Leone | 2014-9-27  |
| KR105349 | G6104.1  | Sierra Leone | 2014-9-28  |
| KR653224 | 20146553 | Sierra Leone | 2014-12-22 |
| KR653225 | 20141650 | Sierra Leone | 2014-10-5  |
| KR653226 | 20142551 | Sierra Leone | 2014-10-18 |
| KR653227 | 20140134 | Sierra Leone | 2014-8-26  |
| KR653228 | 20143550 | Sierra Leone | 2014-11-1  |
| KR653229 | 20141282 | Sierra Leone | 2014-9-23  |
| KR653230 | 20141582 | Sierra Leone | 2014-10-3  |
| KR653231 | 20144865 | Sierra Leone | 2014-11-13 |
| KR653232 | 20141288 | Sierra Leone | 2014-9-23  |
| KR653233 | 20141643 | Sierra Leone | 2014-10-4  |
| KR653234 | 20142127 | Sierra Leone | 2014-10-12 |
| KR653235 | 20140489 | Sierra Leone | 2014-9-4   |
| KR653236 | 20143753 | Sierra Leone | 2014-11-5  |
| KR653237 | 20146001 | Sierra Leone | 2014-11-24 |
| KR653238 | 20144192 | Sierra Leone | 2014-11-8  |
| KR653239 | 20140091 | Sierra Leone | 2014-8-22  |
| KR653240 | 20143918 | Sierra Leone | 2014-11-6  |
| KR653241 | 20140100 | Sierra Leone | 2014-8-24  |
| KR653242 | 20143964 | Sierra Leone | 2014-11-7  |
| KR653243 | 20144820 | Sierra Leone | 2014-11-15 |
| KR653244 | 20141012 | Sierra Leone | 2014-9-21  |
| KR653245 | 20143458 | Sierra Leone | 2014-11-1  |
| KR653246 | 20140433 | Sierra Leone | 2014-9-3   |
| KR653247 | 20143107 | Sierra Leone | 2014-10-25 |
| KR653248 | 20143415 | Sierra Leone | 2014-10-31 |
| KR653249 | 20142407 | Sierra Leone | 2014-10-16 |
| KR653250 | 20141061 | Sierra Leone | 2014-9-21  |
| KR653251 | 20140008 | Sierra Leone | 2014-8-22  |
| KR653252 | 20140024 | Sierra Leone | 2014-8-20  |
| KR653253 | 20143648 | Sierra Leone | 2014-11-3  |
| KR653254 | 20142417 | Sierra Leone | 2014-10-18 |
| KR653255 | 20142477 | Sierra Leone | 2014-10-19 |
| KR653256 | 20143659 | Sierra Leone | 2014-11-3  |
| KR653257 | 20143796 | Sierra Leone | 2014-11-5  |
| KR653258 | 20143360 | Sierra Leone | 2014-10-30 |
| KR653259 | 20144837 | Sierra Leone | 2014-11-14 |
| KR653260 | 20141429 | Sierra Leone | 2014-9-28  |
| KR653261 | 20141271 | Sierra Leone | 2014-9-24  |
| KR653262 | 20142260 | Sierra Leone | 2014-10-14 |
| KR653263 | 20140517 | Sierra Leone | 2014-9-5   |
| KR653264 | 20143938 | Sierra Leone | 2014-11-7  |

|          |          |              |            |
|----------|----------|--------------|------------|
| KR653265 | 20140161 | Sierra Leone | 2014-8-27  |
| KR653266 | 20141232 | Sierra Leone | 2014-9-25  |
| KR653267 | 20140038 | Sierra Leone | 2014-8-23  |
| KR653268 | 20142895 | Sierra Leone | 2014-10-24 |
| KR653269 | 20140910 | Sierra Leone | 2014-9-18  |
| KR653270 | 20144610 | Sierra Leone | 2014-11-12 |
| KR653271 | 20144521 | Sierra Leone | 2014-11-12 |
| KR653272 | 20143018 | Sierra Leone | 2014-10-26 |
| KR653273 | 20141497 | Sierra Leone | 2014-10-1  |
| KR653274 | 20142065 | Sierra Leone | 2014-10-11 |
| KR653275 | 20143031 | Sierra Leone | 2014-10-25 |
| KR653276 | 20141280 | Sierra Leone | 2014-9-23  |
| KR653277 | 20143164 | Sierra Leone | 2014-10-27 |
| KR653278 | 20140590 | Sierra Leone | 2014-9-7   |
| KR653279 | 20140395 | Sierra Leone | 2014-9-2   |
| KR653280 | 20140933 | Sierra Leone | 2014-9-16  |
| KR653282 | 20143317 | Sierra Leone | 2014-10-29 |
| KR653283 | 20141960 | Sierra Leone | 2014-10-9  |
| KR653284 | 20141352 | Sierra Leone | 2014-9-26  |
| KR653285 | 20143036 | Sierra Leone | 2014-10-24 |
| KR653286 | 20140729 | Sierra Leone | 2014-9-10  |
| KR653287 | 20140436 | Sierra Leone | 2014-9-3   |
| KR653288 | 20141397 | Sierra Leone | 2014-9-28  |
| KR653289 | 20141491 | Sierra Leone | 2014-10-1  |
| KR653290 | 20145853 | Sierra Leone | 2014-11-26 |
| KR653291 | 20141123 | Sierra Leone | 2014-9-22  |
| KR653292 | 20143716 | Sierra Leone | 2014-11-4  |
| KR653293 | 20141997 | Sierra Leone | 2014-10-10 |
| KR653294 | 20140174 | Sierra Leone | 2014-8-27  |
| KR653295 | 20145835 | Sierra Leone | 2014-11-25 |
| KR653296 | 20140254 | Sierra Leone | 2014-8-29  |
| KR653297 | 20140872 | Sierra Leone | 2014-9-15  |
| KR653298 | 20143187 | Sierra Leone | 2014-10-28 |
| KR653299 | 20144819 | Sierra Leone | 2014-11-15 |
| KR653300 | 20141241 | Sierra Leone | 2014-9-24  |
| KR653301 | 20142843 | Sierra Leone | 2014-10-23 |
| KR653302 | 20142856 | Sierra Leone | 2014-10-23 |
| KR653303 | 20141227 | Sierra Leone | 2014-9-26  |
| KR653304 | 20143466 | Sierra Leone | 2014-11-1  |
| KR653305 | 20141043 | Sierra Leone | 2014-9-21  |

**Supplementary Table 2. Detecting selection pressures by codon substitution models for GP gene of EBOV.**

| Gene | Class of models        | Model             | lnL         | Compared models                       | df | LRT       | p-value   | Positive selected sites |
|------|------------------------|-------------------|-------------|---------------------------------------|----|-----------|-----------|-------------------------|
|      |                        | Two-ratio Model 2 | -4680.75569 |                                       |    |           |           |                         |
|      | Branch-specific models | One-ratio Model 0 | -4683.32627 | Two-ratio Model 2 - One-ratio Model 1 |    | 5.141164  | 0.023365* | NA                      |
|      |                        | M3                | -4668.13079 |                                       |    |           |           |                         |
|      |                        | M0                | -4683.32627 | M3 - M0                               | 4  | 30.390962 | 0.000005* | NA                      |
|      |                        | M2a               | -4668.14766 |                                       |    |           |           |                         |
|      |                        | M1a               | -4670.42052 | M2a - M1a                             | 2  | 4.54573   | 0.103017  | -                       |
|      |                        | M8                | -4668.138   |                                       |    |           |           |                         |
|      |                        | M7                | -4670.9349  | M8 - M7                               | 2  | 5.593808  | 0.060999  | -                       |
|      |                        | M8                | -4668.138   |                                       |    |           |           |                         |
|      | Site-specific models   | M8a               | -4670.45714 | M8 - M8a                              | 1  | 4.63829   | 0.031267* | NA                      |
|      |                        | Model A           | -4670.42057 |                                       |    |           |           |                         |
|      |                        | M1a               | -4670.42052 | Model A - M1a                         | 2  | 0         | 1         | NA                      |
|      |                        | Model A           | -4670.42057 |                                       |    |           |           |                         |
|      |                        | Model A1          | -4670.42054 | Model A - Model A1                    | 1  | 0         | 1         | -                       |
|      |                        | Model A1          | -4670.42054 |                                       |    |           |           |                         |
|      |                        | M1a               | -4670.42052 | Model A1 - M1a                        | 1  | 0         | 1         | NA                      |
|      |                        | Model D (k=3)     | -4665.12621 |                                       |    |           |           |                         |
| GP   | Branch-site models     | M3                | -4668.13079 | Model D - M3                          | 1  | 6.009164  | 0.014232* | NA                      |

\*Indicates the difference is significant at  $p < 0.05$ .
